# Supplementary material for: Adaptation in bacterial flagellar and motility systems: from regulon members to ‘foraging’-like behavior in E. coli
Source: PubMed Central journal article supplement — Nucleic Acids Res. 2007 Jun 18;35(13):4441–52. doi: 10.1093/nar/gkm456 (PMC1935009; doi:10.1093/nar/gkm456), 2007-06-18

## Supplementary Materials and Methods

### Growth conditions, preparation of cell lysates

All cultures were grown in a New Brunswick Gyrotory water bath shaker (model G76) with vigorous aeration unless otherwise indicated. For cultures of cells carrying antibiotic resistance markers, the media were supplemented with ampicillin (100 µg/ml), chloramphenicol (30 µg/ml), or kanamycin (50 µg/ml) where appropriate. For induction of FlhDC/ $\sigma^F$  under the control of the anhydrotetracycline (aTc)-regulated promoter, aTc was added at a final concentration of 100 ng/ml as described previously (1).

*E. coli* MG1655 WT strain as well as deletion mutant strains were grown overnight in MOPS minimal media at 37°C in an air shaker with vigorous aeration (225 rpm). 2 mL of the overnight culture was used to inoculate 100 mL of fresh MOPS minimal medium. When the culture density reached OD<sub>600</sub> 0.2, a 1000 µL portion of culture was harvested into a pre-chilled 1.5 mL Eppendoff tube and then immediately put on ice for 1 minute before being centrifuged at 10,000 g (12,000 rpm for BECKMAN Microfuge<sup>R</sup>) for 10 minutes at 4°C. The supernatant was removed and the cell pellet resuspended immediately in 40 µl lysis buffer (1XSDS) and heated at 75°C for 5 minutes to quickly lyse the cells and prevent changes in the intracellular levels of the sigma factors being measured. The *fliA* deletion strain was confirmed to have lost expression of  $\sigma^F$  compared to the expression of  $\sigma^F$  in wild-type MG1655 by Western blot analysis using a monoclonal antibody against  $\sigma^F$  (2).

Instead of using a  $\sigma^{32}$ -inducible strain as shown in previous  $\sigma^{32}$  regulon studies (1), we used strains carrying a plasmid with either an aTc-inducible FlhDC or  $\sigma^F$  gene in this work. The same experimental procedures for induction, collection and treatment of sample were performed as described below and in more detail in our  $\sigma^{32}$  regulon paper.

### RNA isolation, cDNA synthesis, labeling and hybridization

For preparing the total RNA for microarray experiments, 15 mL samples of culture (corresponding to  $7.5 \times 10^9$  cells) were taken for wild-type and mutant strains when the culture density  $OD_{600}$  value reached 0.2 and the same amount of culture was taken before and 5 minutes after induction in FlhDC or  $\sigma^F$  overexpression strains. RNA was stabilized immediately by mixing with a double volume of RNAprotect Bacterial Reagent (Qiagen) and incubated at room temperature for 10 min. Cells were centrifuged at 5,800 g for 20 minutes and cell pellets were stored at  $-80^\circ\text{C}$  prior to RNA extraction. Total nucleic acid was isolated using MasterPure kits (Epicentre) as described by the manufacturer. DNase I (Epicentre) was used to remove genomic DNA contamination. Total RNA was purified, precipitated and resuspended in diethylpyrocarbonate (DEPC)-treated water. The quality and integrity of the isolated RNA was checked by visualizing the 23S and 16S rRNA bands on a 2% agarose gel. 10  $\mu\text{g}$  of total RNA was mixed with 500 ng random hexamers and then was reverse transcribed for first strand cDNA by using the Superscript II system (Invitrogen). RNA was removed by using RNase H (Life Technologies) and RNase A (Epicentre). cDNA was purified by using Qiaquick PCR purification kit (Qiagen) and followed by partial DNase I digestion to fragment cDNA to an average length of 50-100bp. The fragmented cDNA was 3'-end-labeled by using terminal transferase (New England Biolabs) and biotin-N6-ddATP (PerkinElmer) and was added to hybridization solution to load on Affymetrix GeneChip<sup>R</sup> *E. coli* Antisense Genome Arrays. Hybridization was carried out at  $45^\circ\text{C}$  for 16 h. The arrays were then washed and subsequently stained with streptavidin, biotin-bound anti-streptavidin antibody and streptavidin-phycoerythrin (Molecular Probes) to enhance the signal. Arrays were scanned at 570 nm with 3  $\mu\text{m}$  resolution using a confocal laser scanner (Hewlett-Packard).

### **Data analysis**

Image analysis was carried out by Affymetrix<sup>®</sup> Microarray Suite 5.0 software. Cell intensity files were first generated from the image data files. An absolute expression analysis

then computes the detection call, detection p-value and signal (background-subtracted and adjusted for noise) for each gene. Genes were considered up-regulated relative to the 0 time point (before induction) / wild-type strain sample if they had a 2-fold increase in signal intensity and the signal intensity in the experiment had a  $\log_2$  value of at least 8.0 and a detect level equal one; The higher  $\log_2$  intensity values were used to limit the analysis to those genes for which we have a high degree of confidence in their level of expression.

### **Array design**

The GeneChip<sup>®</sup> *E. coli* Antisense Genome Array was purchased from Affymetrix (catalog number: 900381). It contains *in situ* synthesized probe sets to detect the antisense strand of more than 4,200 known open reading frames and over 1,350 intergenic regions. A given gene is represented by 15 different 25-mer oligonucleotides that are designed to be complementary to the target sequence (3-5). Sequence information for probes on the array corresponds to the M54 version of the *E. coli* Genome Project database at the University of Wisconsin. Complete array information, including the location for each feature on the array, can be found at [www.affymetrix.com](http://www.affymetrix.com).

### **Reverse transcriptase (RT)-PCR**

Total RNA was isolated using the Epicentre MasterPure RNA Purification kits. cDNA was reverse transcribed from a mixture containing 5  $\mu\text{g}$  total RNA, 250 ng random hexamers and Invitrogen Superscript II enzyme system at a volume of 30  $\mu\text{l}$  (see RNA isolation, cDNA synthesis, labeling and hybridization). Reverse transcription was carried out at 42°C for 90 minutes.

*PCR protocol.* Each reaction was done in a final volume of 25  $\mu\text{l}$  containing 0.1  $\mu\text{l}$  of cDNA, 2.5  $\mu\text{l}$  of Taq 10x buffer, 0.5  $\mu\text{l}$  of dNTP (10 mM), 25 pmol/primer, 0.1  $\mu\text{l}$  of Taq polymerase (5 U). The following cycles were applied: 5 min at 95°C; 24 cycles (for semi-

quantitative PCRs) or 35 cycles (for all other PCRs) of: 30 s at 92°C; 30 s at 56°C; 60 s at 72°C. Ten microliter PCR mixtures were loaded on a 1.2% agarose gel for electrophoresis and analysis.

### **Purification and fluorescence labeling of proteins and MAbs for immunoblot assay**

Purified core RNA polymerase was made from *E. coli* MG1655 according to the method of Thompson et al. (6). Purified sigma factors and monoclonal antibodies (MAbs) were made as described in Anthony et al (2). Purified core RNA polymerase and sigma factors were used in *in vitro* transcription assays. Mouse MAbs used in this experiment were anti- $\beta'$  (NT73) and anti- $\sigma^F$  (1RF18) for measuring the intracellular level changes of  $\sigma^F$  in cells. Fluorescent dye, IC5-OSu (Dojindo), was used to label the primary antibodies according to previously described methods (7). The IC5-labeled MAbs, at final stored concentrations of 1 mg/ml, were diluted 1:2000 for use in this experiment. Electrophoresis and immunoblot assays were performed as described in a previous paper (1). Signal intensities of the bands were quantified using the ImageQuant program.

### **Supplemental Figure Legends**

**Figure S1: Construction of *E. coli* in-frame deletion strains.** In order to disrupt the expression of target gene(s) in *E. coli*, we used a simple and highly efficient method (8,9) to prepared in-frame deletion strains. In this procedure, we generated PCR products by using primers with 60- to 70-nt extensions that are homologous to regions adjacent target gene(s) and a template plasmid carrying kanamycin-antibiotic resistance genes. The PCR generated linear DNA was then electroporated into competent cells harboring the pKD46 plasmid that are induced with arabinose to activate expression of the  $\lambda$ Red system ( $\gamma$ ,  $\beta$ , and *exo*) for homologous recombination in *E. coli*. Deletion mutants were isolated as kanamycin antibiotic-resistant colonies after introducing the respective PCR products into bacteria genome. The temperature-sensitive replication allows easily curing of the pKD46 plasmid from the resultant mutants.

**Figure S2: Purification CRP protein.** CRP overexpression strain was constructed using plasmid pET28b from Novagen. After overexpression, CRP protein (as shown in lane B10, B11 and B12) was purified from the soluble fraction (as shown in lane B4) by Ni-NTA chromatography. CRP protein (shown in lane C5, C6 and C7 as output) was further purified from the eluted protein fractions of the Ni-NTA column (shown in Lane C4 as input) by chromatography on a HiLoad 16/60 superdex 200 size exclusion column (Amersham Bioscience).

**Figure S3: Transcriptional level changes of CRP-dependent genes in the *cyaA* deficient strain in response with different carbon sources.** The transcript abundance of CRP-dependent genes, *cstA*, *cpdB* and *flhD*, show no significant changes in *cyaA* deficient cells grown on different carbon sources. CyaA encodes adenylate cyclase that is required to catalyze the intramolecular transfer of the adenylyl group of ATP from pyrophosphate to the 3'-hydroxyl group to form cyclic AMP (10).

## REFERENCES

1. Zhao, K., Liu, M. and Burgess, R.R. (2005) The global transcriptional response of *Escherichia coli* to induced sigma32 protein involves sigma32 regulon activation followed by inactivation and degradation of sigma32 in vivo. *J Biol Chem*, **280**, 17758-17768.
2. Anthony, L.C., Foley, K.M., Thompson, N.E. and Burgess, R.R. (2003) Expression, purification of, and monoclonal antibodies to sigma factors from *Escherichia coli*. *Methods Enzymol*, **370**, 181-192.
3. Wilson, K.H., Wilson, W.J., Radosevich, J.L., DeSantis, T.Z., Viswanathan, V.S., Kuczmariski, T.A. and Andersen, G.L. (2002) High-density microarray of small-subunit ribosomal DNA probes. *Appl Environ Microbiol*, **68**, 2535-2541.
4. Liu, G., Loraine, A.E., Shigeta, R., Cline, M., Cheng, J., Valmeekam, V., Sun, S., Kulp, D. and Siani-Rose, M.A. (2003) NetAffx: Affymetrix probesets and annotations. *Nucleic Acids Res*, **31**, 82-86.
5. Bockhorst, J., Qiu, Y., Glasner, J., Liu, M., Blattner, F. and Craven, M. (2003) Predicting bacterial transcription units using sequence and expression data. *Bioinformatics*, **19 Suppl 1**, i34-43.
6. Thompson, N.E., Hager, D.A. and Burgess, R.R. (1992) Isolation and characterization of a polyol-responsive monoclonal antibody useful for gentle purification of *Escherichia coli* RNA polymerase. *Biochemistry*, **31**, 7003-7008.

7. Bergendahl, V., Glaser, B.T. and Burgess, R.R. (2003) A fast Western blot procedure improved for quantitative analysis by direct fluorescence labeling of primary antibodies. *J Immunol Methods*, **277**, 117-125.
8. Kang, Y., Durfee, T., Glasner, J.D., Qiu, Y., Frisch, D., Winterberg, K.M. and Blattner, F.R. (2004) Systematic mutagenesis of the Escherichia coli genome. *J Bacteriol*, **186**, 4921-4930.
9. Datsenko, K.A. and Wanner, B.L. (2000) One-step inactivation of chromosomal genes in Escherichia coli K-12 using PCR products. *Proc Natl Acad Sci U S A*, **97**, 6640-6645.
10. Holland, M.M., Leib, T.K. and Gerlt, J.A. (1988) Isolation and characterization of a small catalytic domain released from the adenylate cyclase from Escherichia coli by digestion with trypsin. *J Biol Chem*, **263**, 14661-14668.

**Table SI:** Transcriptional levels of all 53 known flagellar genes are downregulated in FlhDC deletion strain

| b no. <sup>a</sup> | Gene                      | Product                                                                                                                          | Function                       | <i>flhDC</i> deletion |
|--------------------|---------------------------|----------------------------------------------------------------------------------------------------------------------------------|--------------------------------|-----------------------|
| b1881              | <i>cheZ</i> <sup>b*</sup> | chemotactic response, CheY protein phosphatase                                                                                   | Chemotaxis and mobility        | -181.6 <sup>c</sup>   |
| b1887              | <i>cheW</i> <sup>*</sup>  | purine-binding chemotaxis protein; regulation                                                                                    | Chemotaxis and mobility        | -108.8                |
| b1889              | <i>motB</i> <sup>*</sup>  | enables flagellar motor rotation, linking torque machinery to cell wall                                                          | Chemotaxis and mobility        | -82.1                 |
| b1890              | <i>motA</i> <sup>*</sup>  | proton conductor component of motor, torque generator                                                                            | Chemotaxis and mobility        | -40.5                 |
| b1886              | <i>tar</i> <sup>*</sup>   | methyl-accepting chemotaxis protein II, aspartate sensor receptor                                                                | Chemotaxis and mobility        | -31.8                 |
| b1888              | <i>cheA</i> <sup>*</sup>  | chemotactic sensory histidine kinase (soluble) in two-component regulatory system with CheB and CheY, senses chemotactic signal  | Chemotaxis and mobility        | -29.8                 |
| b1883              | <i>cheB</i> <sup>*</sup>  | chemotactic response regulator; methyl-esterase, in two-component regulatory system with CheA, regulates chemotactic response    | Chemotaxis and mobility        | -20.5                 |
| b1882              | <i>cheY</i> <sup>*</sup>  | chemotactic response regulator in two-component regulatory system with CheA, transmits signals to FliM flagellar motor component | Chemotaxis and mobility        | -15.2                 |
| b1884              | <i>cheR</i> <sup>*</sup>  | chemotactic response, glutamate methyltransferase                                                                                | Chemotaxis and mobility        | -14.5                 |
| b1885              | <i>tap</i> <sup>*</sup>   | methyl-accepting chemotaxis protein IV, peptide sensor receptor                                                                  | Chemotaxis and mobility        | -8.9                  |
| b4355              | <i>tsr</i> <sup>*</sup>   | methyl-accepting chemotaxis protein I, serine sensor receptor                                                                    | Chemotaxis and mobility        | -7.8                  |
| b1421              | <i>trg</i> <sup>*</sup>   | methyl-accepting chemotaxis protein III, ribose and galactose sensor receptor                                                    | Chemotaxis and mobility        | -2.0                  |
| b3072              | <i>aer</i> <sup>*</sup>   | aerotaxis sensor receptor, senses cellular redox state or proton motive force                                                    | Degradation of small molecules | -2.7                  |
| b1880              | <i>flhB</i>               | putative part of export apparatus for flagellar proteins                                                                         | Not classified                 | -4.5                  |
| b1920              | <i>fliY</i>               | cysteine transport protein (ABC superfamily)                                                                                     | Not classified                 | -2.6                  |
| b1944              | <i>fliL</i>               | flagellar biosynthesis                                                                                                           | Surface structures             | -200.9                |
| b1080              | <i>flgI</i>               | putative flagella basal body protein                                                                                             | Surface structures             | -186.8                |
| b1073              | <i>flgB</i>               | flagellar biosynthesis; cell-proximal portion of basal-body rod                                                                  | Surface structures             | -181.6                |
| b1923              | <i>fliC</i> <sup>*</sup>  | flagellar biosynthesis; flagellin, filament structural protein                                                                   | Surface structures             | -152.2                |
| b1074              | <i>flgC</i>               | flagellar biosynthesis; cell-proximal portion of basal-body rod                                                                  | Surface structures             | -143.5                |
| b1076              | <i>flgE</i>               | flagellar biosynthesis; hook protein                                                                                             | Surface structures             | -134.8                |
| b1083              | <i>flgL</i> <sup>*</sup>  | flagellar biosynthesis; hook-filament junction protein                                                                           | Surface structures             | -110.3                |
| b1922              | <i>fliA</i>               | sigma F (sigma 28) factor of RNA polymerase, transcription of late flagellar genes (class 3a and 3b operons)                     | Surface structures             | -67.9                 |
| b1949              | <i>fliQ</i>               | flagellar biosynthesis                                                                                                           | Surface structures             | -65.8                 |
| b1924              | <i>fliD</i> <sup>*</sup>  | flagellar biosynthesis; filament capping protein, enables filament assembly                                                      | Surface structures             | -56.9                 |
| b1948              | <i>fliP</i>               | flagellar biosynthesis                                                                                                           | Surface structures             | -55.7                 |
| b1945              | <i>fliM</i>               | flagellar biosynthesis; component of motor switch and energizing                                                                 | Surface structures             | -36.4                 |
| b1077              | <i>flgF</i>               | flagellar biosynthesis; cell-proximal portion of basal-body rod                                                                  | Surface structures             | -32.8                 |
| b1075              | <i>flgD</i>               | flagellar biosynthesis; initiation of hook assembly                                                                              | Surface structures             | -31.3                 |
| b1070              | <i>flgN</i> <sup>*</sup>  | flagellar biosynthesis; believed to be export chaperone for FlgK, FlgL                                                           | Surface structures             | -29.9                 |
| b1078              | <i>flgG</i>               | flagellar biosynthesis; cell-distal portion of basal-body rod                                                                    | Surface structures             | -28.6                 |

|       |       |                                                                                             |                    |       |
|-------|-------|---------------------------------------------------------------------------------------------|--------------------|-------|
| b1079 | flgH  | flagellar biosynthesis; basal-body outer-membrane L (lipopolysaccharide layer) ring protein | Surface structures | -28.4 |
| b1071 | flgM* | anti-FliA (anti-sigma) factor; also known as RflB protein                                   | Surface structures | -26.5 |
| b1942 | fliJ  | flagellar fliJ protein                                                                      | Surface structures | -26.4 |
| b1082 | flgK* | flagellar biosynthesis; hook-filament junction protein 1                                    | Surface structures | -26.3 |
| b1879 | flhA  | putative export protein for flagellar biosynthesis                                          | Surface structures | -23.3 |
| b1947 | fliO  | flagellar biosynthesis                                                                      | Surface structures | -22.2 |
| b1946 | fliN  | flagellar biosynthesis; component of motor switch and energizing                            | Surface structures | -21.6 |
| b1925 | fliS* | flagellar biosynthesis; repressor of class 3a and 3b operons (RflA activity)                | Surface structures | -19.4 |
| b1941 | fliI  | flagellum-specific ATP synthase                                                             | Surface structures | -13.5 |
| b1072 | flgA  | flagellar biosynthesis; assembly of basal-body periplasmic P ring                           | Surface structures | -13.2 |
| b1950 | fliR  | putative flagellar biosynthetic protein, putative regulator                                 | Surface structures | -12.3 |
| b1878 | flhE  | flagellar protein                                                                           | Surface structures | -11.9 |
| b1937 | fliE  | flagellar biosynthesis; basal-body component                                                | Surface structures | -11.5 |
| b1938 | fliF  | flagellar biosynthesis; basal-body MS(membrane and supramembrane)-ring and collar protein   | Surface structures | -10.7 |
| b1943 | fliK  | flagellar hook-length control protein                                                       | Surface structures | -10.4 |
| b1891 | flhC  | transcriptional activator of flagellar class II biosynthesis, tetramer with FlhD            | Surface structures | -8.7  |
| b1939 | fliG  | flagellar biosynthesis; component of motor switching and energizing                         | Surface structures | -7.8  |
| b1926 | fliT* | flagellar biosynthesis; putative export chaperone for FliD                                  | Surface structures | -7.5  |
| b1081 | flgJ  | flagellar biosynthesis                                                                      | Surface structures | -6.0  |
| b1892 | flhD  | transcriptional activator of flagellar class II biosynthesis, tetramer with FlhC            | Surface structures | -5.7  |
| b1940 | fliH  | flagellar biosynthesis; putative export of flagellar proteins                               | Surface structures | -4.4  |
| b1921 | fliZ  | putative regulator of FliA                                                                  | Unknown            | -52.5 |

<sup>a</sup> b no. indicates Blattner number

<sup>b</sup> It is possible that one gene has several different gene names

<sup>c</sup> Numbers indicate fold change relative to wild-type strain

\* Known to be class III genes, transcribed by  $\sigma^F$

**Table SII: Additional candidate genes for FlhDC regulon<sup>d</sup>**

| b no. <sup>a</sup> | Gene              | Product                                                                                   | Function                                       | <i>flhDC</i> deletion |
|--------------------|-------------------|-------------------------------------------------------------------------------------------|------------------------------------------------|-----------------------|
| b1904              | yecR <sup>b</sup> | conserved hypothetical protein                                                            | Unknown                                        | -25.1 <sup>c</sup>    |
| b1044              | ymdA              | conserved hypothetical protein                                                            | Unknown                                        | -14.6                 |
| b0306              | ykgE              | putative oxidoreductase                                                                   | Not classified                                 | -5.3                  |
| b3435              | gntU_2            | split gene, low-affinity gluconate transport permease protein in GNT I system, fragment 2 | Transport of small molecules                   | -5.2                  |
| b3666              | uhpT              | hexose phosphate transport protein (MFS family)                                           | Transport of small molecules                   | -5.1                  |
| b0625              | ybeH              | unknown                                                                                   | Unknown                                        | -4.5                  |
| b3543              | dppB              | dipeptide transport protein 1 (ABC superfamily, membrane)                                 | Protein, peptide secretion                     | -4.2                  |
| b0971              | serT              | serine tRNA 1                                                                             | tRNA                                           | -4.2                  |
| b3436              | gntU_1            | split gene, low-affinity gluconate transport permease protein in GNT I system, fragment 1 | Transport of small molecules                   | -4.0                  |
| b4077              | gltP              | glutamate:aspartate symporter (DAACS family)                                              | Transport of small molecules                   | -3.4                  |
| b1722              | ydiY              | conserved hypothetical protein                                                            | Unknown                                        | -3.3                  |
| b1084              | me                | RNase E: endoribonuclease for rRNA processing and mRNA degradation                        | Degradation of RNA                             | -3.2                  |
| b0974              | hyaC              | putative Ni/Fe-hydrogenase, 1 b-type cytochrome subunit                                   | Energy metabolism, carbon: Aerobic respiration | -3.2                  |

<sup>a</sup> b no. indicates Blattner number

<sup>b</sup> It is possible that one gene has several different gene names.

<sup>c</sup> Numbers indicate fold change relative to wild-type strain.

<sup>d</sup> Gene downregulated  $\geq 3$  fold

Figure S1:

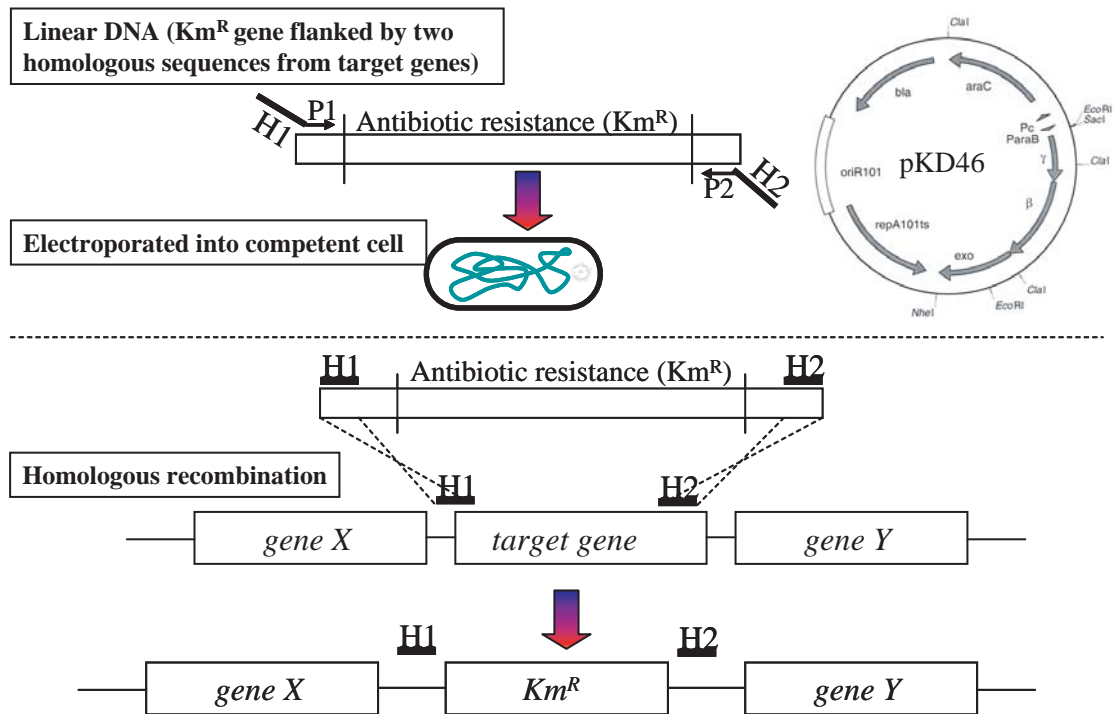



Figure S2:

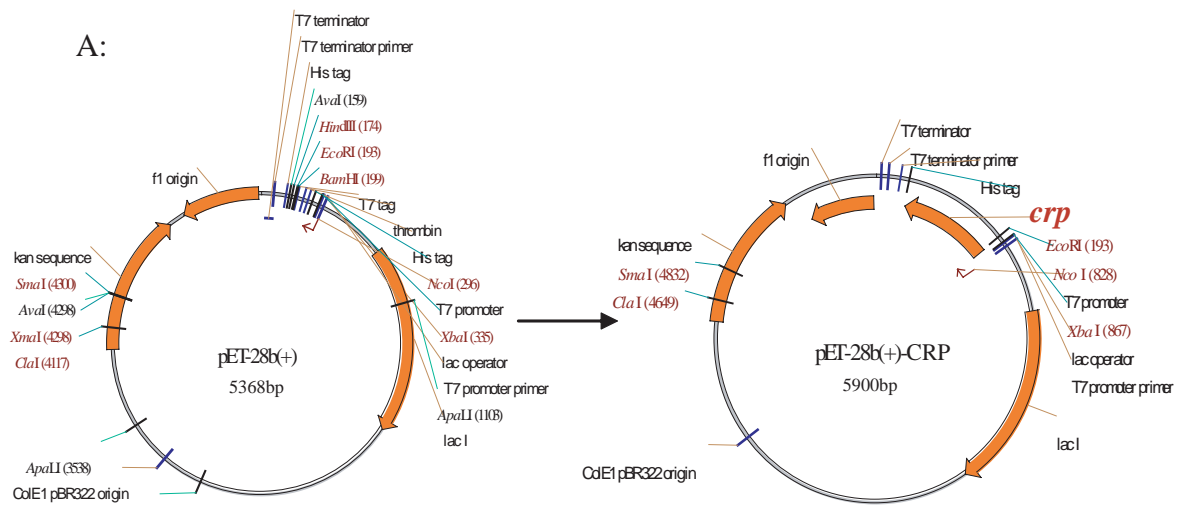

**B:**

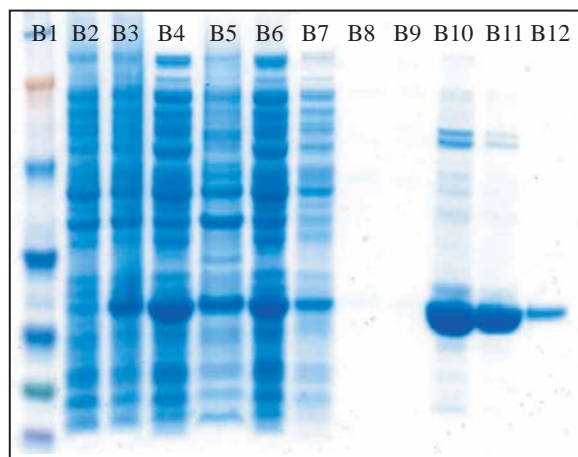

**C:**

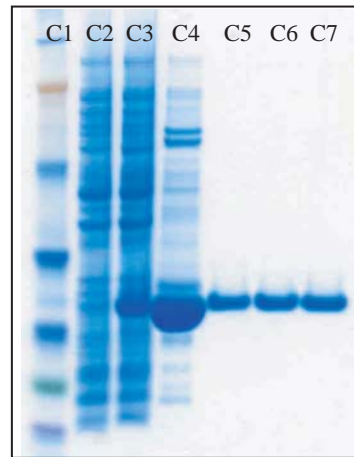

Figure S3:

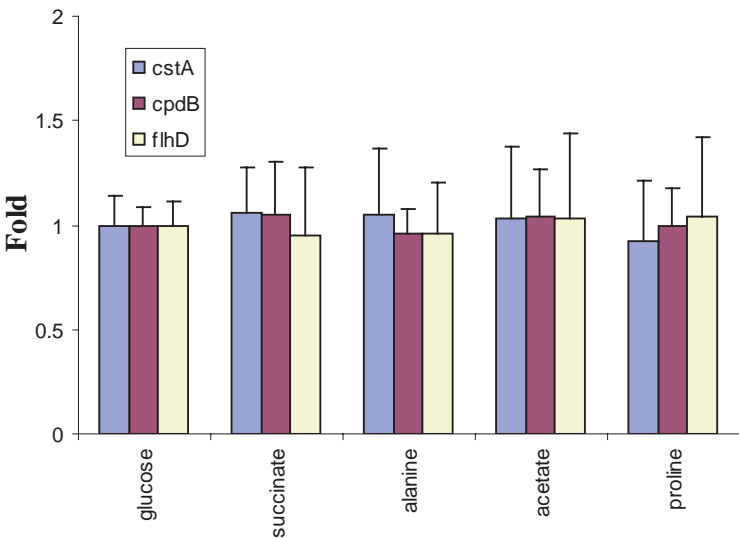

Supplement: nar_gkm456_1.pdf [file nar_gkm456_1.pdf]
